# Supplementary material for: Biologically-informed neural networks guide mechanistic modeling from sparse experimental data
Source: PubMed Central journal article supplement (PMC7732115; doi:10.1371/journal.pcbi.1008462), 2020-12-01
Supplement: pcbi.1008462.s014.pdf [file pcbi.1008462.s014.pdf]

| Parameter                         | Initial cell density |        |        |        |        |        |
|-----------------------------------|----------------------|--------|--------|--------|--------|--------|
|                                   | 10,000               | 12,000 | 14,000 | 16,000 | 18,000 | 20,000 |
| $D$ ( $\mu\text{m}^2/\text{hr}$ ) | 309.7                | 253.8  | 681.8  | 540.9  | 735.7  | 978.5  |
| $r$ ( $1/\text{hr}$ )             | 0.0437               | 0.0438 | 0.0483 | 0.0490 | 0.0540 | 0.0649 |
