# Supplementary material for: Biologically-informed neural networks guide mechanistic modeling from sparse experimental data
Source: PubMed Central journal article supplement (PMC7732115; doi:10.1371/journal.pcbi.1008462), 2020-12-01
Supplement: pcbi.1008462.s015.pdf [file pcbi.1008462.s015.pdf]

| Parameter                         | Initial cell density |        |        |        |        |        |
|-----------------------------------|----------------------|--------|--------|--------|--------|--------|
|                                   | 10,000               | 12,000 | 14,000 | 16,000 | 18,000 | 20,000 |
| $D$ ( $\mu\text{m}^2/\text{hr}$ ) | 1851.8               | 465.0  | 2993.4 | 2371.0 | 2377.8 | 2017.1 |
| $m$ (unitless)                    | 0.9704               | 0.3001 | 0.9923 | 0.9879 | 0.8265 | 0.6235 |
| $r$ ( $1/\text{hr}$ )             | 0.0435               | 0.0436 | 0.0481 | 0.0484 | 0.0526 | 0.0639 |
